# Supplementary material for: The Role of Anxiety and Depression in Shaping the Sleep–Pain Connection in Patients with Nonspecific Chronic Spinal Pain and Comorbid Insomnia: A Cross-Sectional Analysis
Source: MDPI journal article supplement (doi:10.3390/jcm13051452), 2024-03-02
Supplement: s1 [file s1]

**Table S1***Edge weights matrix: regularized GGM*

|        | ISI1 | ISI2 | ISI3 | ISI4 | ISI7 | BPI  | SF21 | SF22 | HADS1 | HADS5 | HADS8 | HADS11 | SF31 |
|--------|------|------|------|------|------|------|------|------|-------|-------|-------|--------|------|
| ISI1   | .00  |      |      |      |      |      |      |      |       |       |       |        |      |
| ISI2   | .00  | .00  |      |      |      |      |      |      |       |       |       |        |      |
| ISI3   | -.11 | .19  | .00  |      |      |      |      |      |       |       |       |        |      |
| ISI4   | .00  | .42  | .00  | .00  |      |      |      |      |       |       |       |        |      |
| ISI7   | .21  | .00  | .00  | .34  | .00  |      |      |      |       |       |       |        |      |
| BPI    | .00  | .14  | .00  | .00  | .00  | .00  |      |      |       |       |       |        |      |
| SF21   | .00  | .00  | .00  | .00  | .00  | .40  | .00  |      |       |       |       |        |      |
| SF22   | .00  | .00  | .00  | .00  | .00  | .00  | .47  | .00  |       |       |       |        |      |
| HADS1  | .21  | .00  | .00  | .14  | -.10 | .00  | .00  | .00  | .00   |       |       |        |      |
| HADS5  | .00  | .00  | .00  | -.20 | .25  | -.12 | .00  | .16  | .33   | .00   |       |        |      |
| HADS8  | -.18 | .00  | .00  | .00  | .33  | .00  | .00  | .18  | .14   | .00   | .00   |        |      |
| HADS11 | .00  | .00  | .00  | .00  | .00  | .00  | .00  | .13  | .21   | .10   | .00   | .00    |      |
| SF31   | .00  | .00  | .00  | .00  | .00  | -.12 | .00  | .27  | .17   | .00   | .16   | -.24   | .00  |
