# Supplementary figures and images for: The Role of Anxiety and Depression in Shaping the Sleep–Pain Connection in Patients with Nonspecific Chronic Spinal Pain and Comorbid Insomnia: A Cross-Sectional Analysis
Source: MDPI journal article supplement (doi:10.3390/jcm13051452), 2024-03-02

**Figure S4**

*Spearman correlation network*

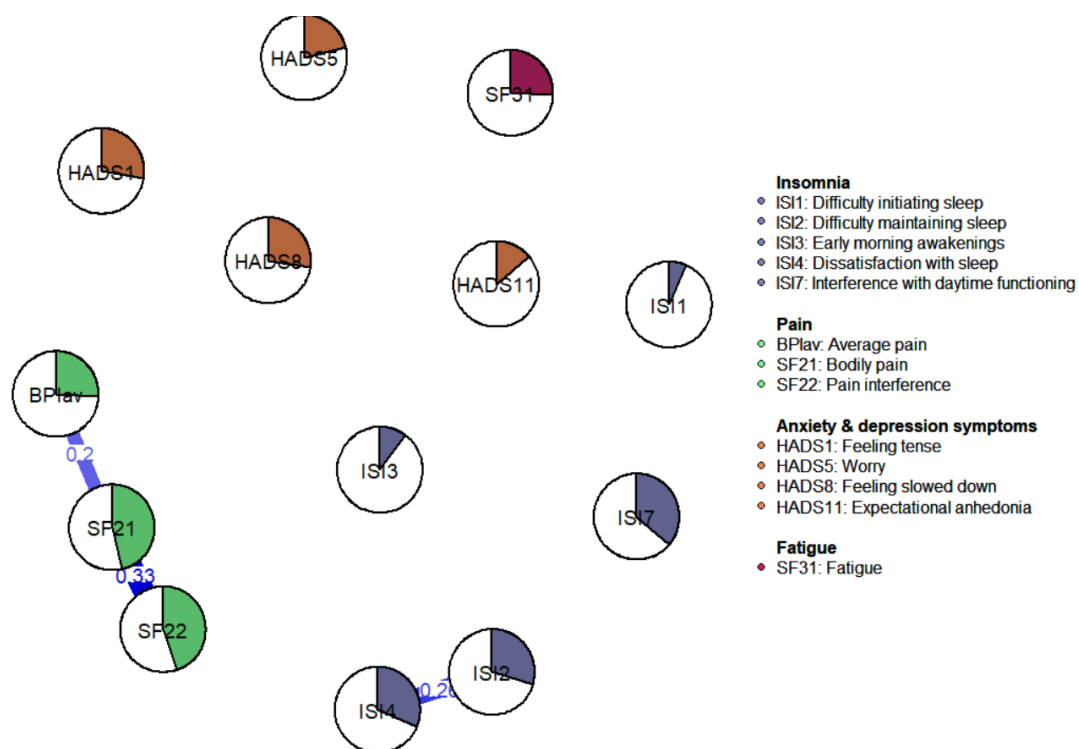

Supplement: s1 [file s1]

**Figure S5**

*Centrality difference test: GGM*

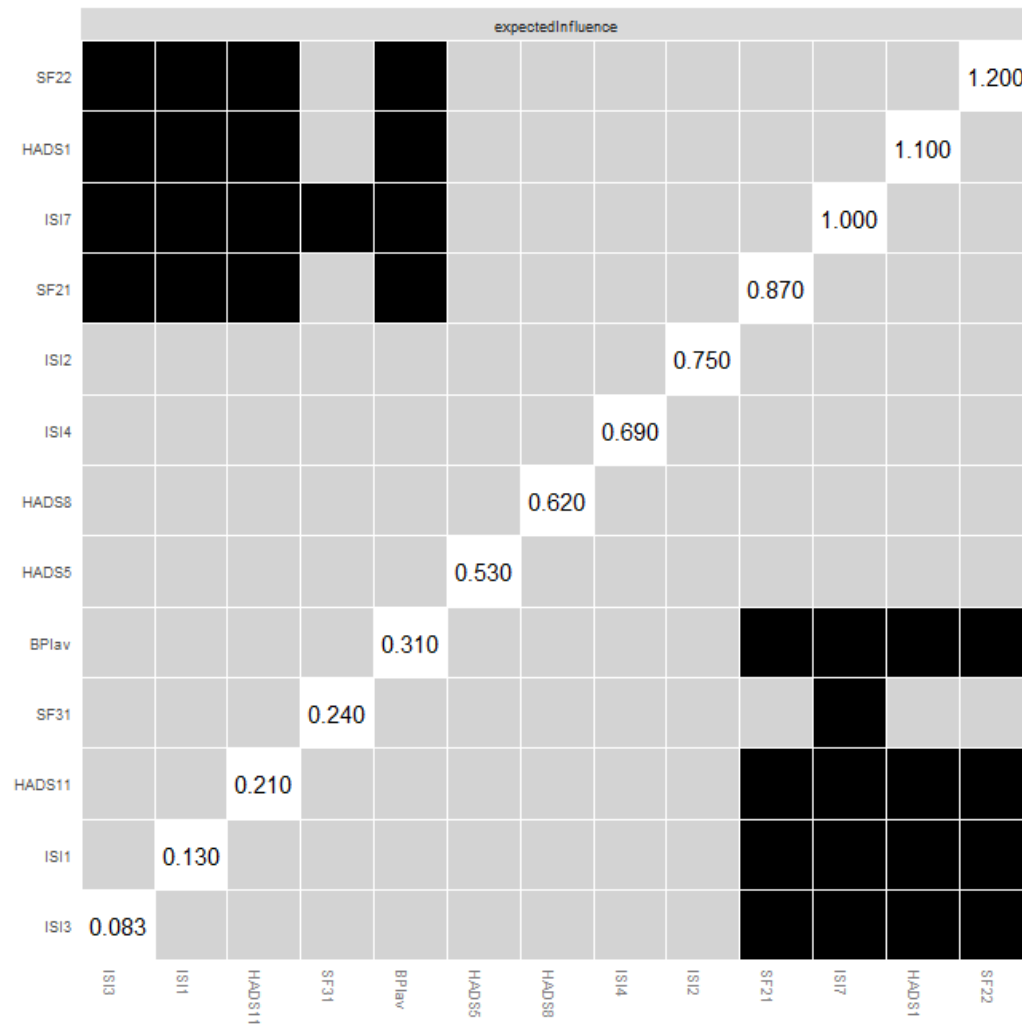

Supplement: s1 [file s1]

**Figure S2**

*Centrality stability graph: GGM*

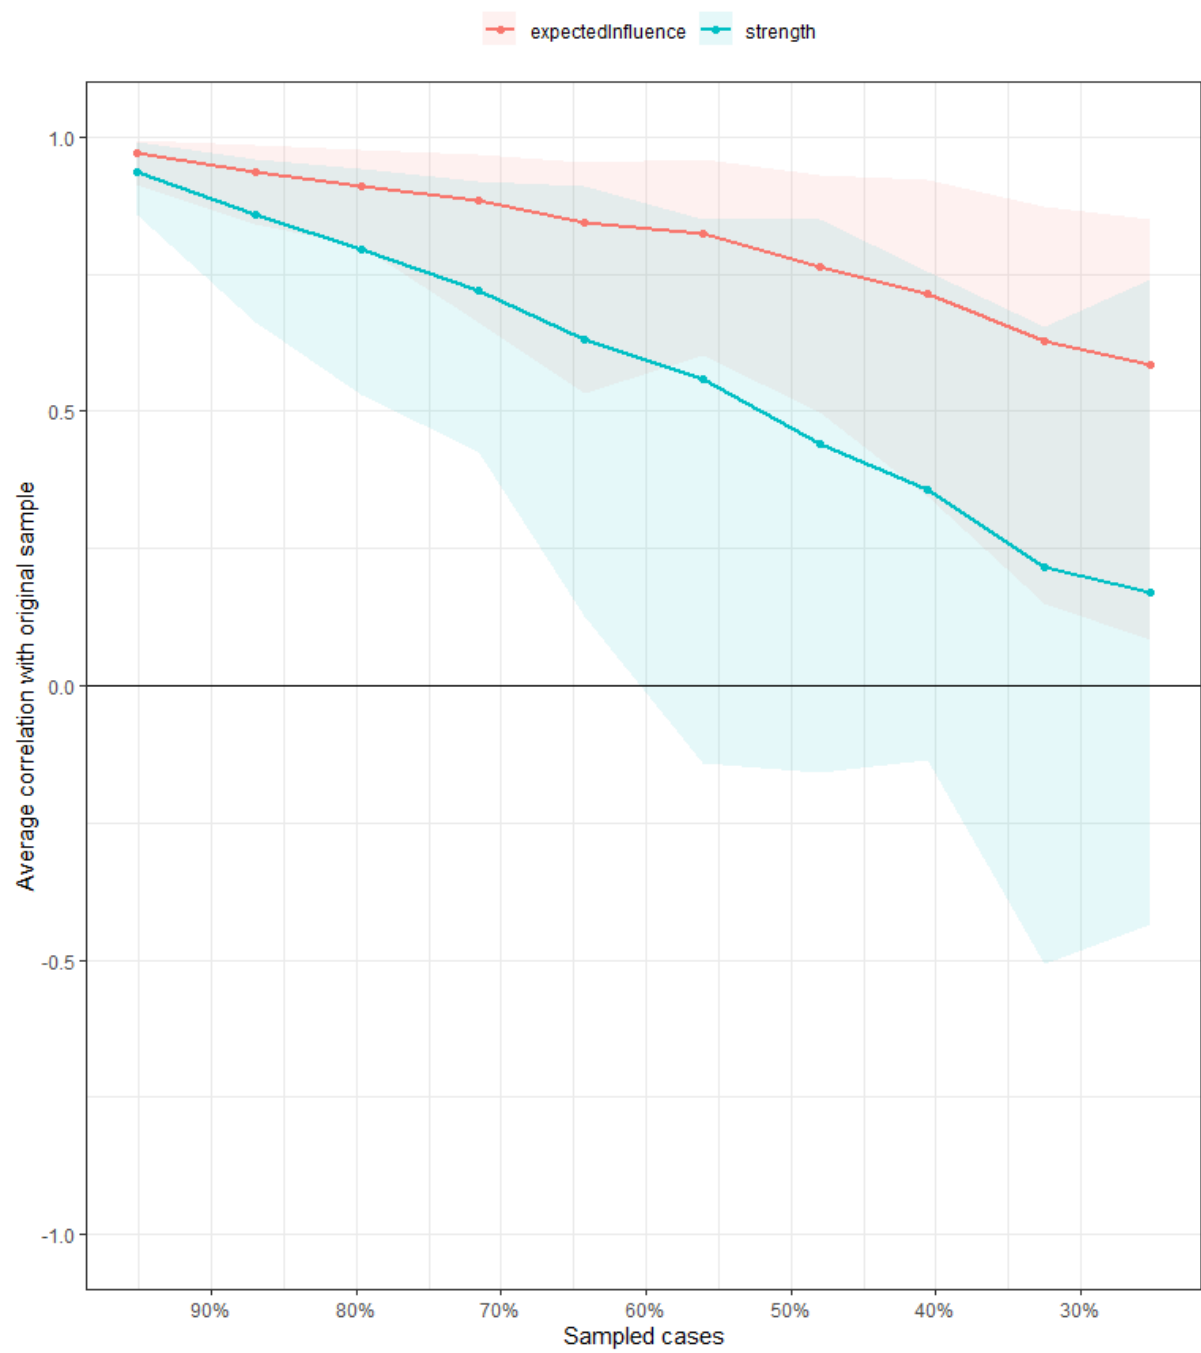

Supplement: s1 [file s1]
